# Supplementary material
Source: PubMed Central journal article supplement (PMC3970761)
Supplement: NIHMS559115-supplement-01.pdf [file NIHMS559115-supplement-01.pdf]

Supplemental Materials

| Table – Characteristics and Causes of Death for Non-Survivors at 90 Days |                 |             |                |                                 |                           |                                 |
|--------------------------------------------------------------------------|-----------------|-------------|----------------|---------------------------------|---------------------------|---------------------------------|
|                                                                          | Treatment Group | Age (years) | Baseline NIHSS | Symptomatic ICH Within 36 Hours | Treatment to death (days) | Primary Cause of Death          |
| 1                                                                        | Combination     | 84.9        | 25             | No                              | 51                        | Cardiac arrest                  |
| 2                                                                        | Combination     | 79.9        | 14             | No                              | 26                        | Cardiac arrest                  |
| 3                                                                        | Combination     | 70.8        | 28             | Yes                             | 6                         | Stroke                          |
| 4                                                                        | Combination     | 77.3        | 18             | No                              | 38                        | Failure to thrive               |
| 5                                                                        | Combination     | 81.8        | 25             | Yes                             | 1                         | Stroke/sICH                     |
| 6                                                                        | Combination     | 85.1        | 6              | No                              | 12                        | Stroke                          |
| 7                                                                        | Combination     | 83.0        | 27             | No                              | 3                         | Stroke                          |
| 8                                                                        | Combination     | 85.9        | 22             | No                              | 3                         | Stroke                          |
| 9                                                                        | Combination     | 77.7        | 24             | No                              | 4                         | Stroke                          |
| 10                                                                       | Combination     | 84.9        | 31             | No                              | 5                         | Stroke                          |
| 11                                                                       | Combination     | 78.2        | 6              | No                              | 14                        | Stroke                          |
| 12                                                                       | Combination     | 71.3        | 22             | No                              | 4                         | Stroke                          |
| 13                                                                       | Combination     | 85.6        | 22             | No                              | 4                         | Stroke                          |
| 14                                                                       | Combination     | 81.6        | 31             | No                              | 4                         | Stroke                          |
| 15                                                                       | Combination     | 51.6        | 27             | No                              | 5                         | Stroke                          |
| 15                                                                       | Combination     | 85.3        | 30             | No                              | 4                         | Stroke/Congestive Heart Failure |
| 17                                                                       | Combination     | 71.4        | 15             | No                              | 22                        | Pneumonia                       |
| 18                                                                       | Combination     | 75.1        | 20             | No                              | 3                         | Stroke                          |
| 19                                                                       | Combination     | 77.4        | 7              | No                              | 19                        | Stroke                          |
| 20                                                                       | Combination     | 60.2        | 10             | No                              | 42                        | Acute Renal Failure             |
| 21                                                                       | Standard        | 77.4        | 19             | Yes                             | 28                        | Stroke                          |
| 22                                                                       | Standard        | 82.8        | 26             | No                              | 7                         | Stroke                          |
| 23                                                                       | Standard        | 75.4        | 20             | Yes                             | 1                         | Stroke/sICH                     |
| 24                                                                       | Standard        | 55.0        | 25             | No                              | 5                         | Stroke                          |

| Table – Improvement using NIHSS                                                                                                                                                                                                                                                                                                                          |                                    |                          |                        |                         |
|----------------------------------------------------------------------------------------------------------------------------------------------------------------------------------------------------------------------------------------------------------------------------------------------------------------------------------------------------------|------------------------------------|--------------------------|------------------------|-------------------------|
|                                                                                                                                                                                                                                                                                                                                                          | rt-PA +<br>eptifibatide<br>(n=101) | rt-PA<br>(n=25)          | Odds Ratio,<br>95% CI* | P value                 |
| <b>Protocol specified early / late efficacy endpoints</b>                                                                                                                                                                                                                                                                                                |                                    |                          |                        |                         |
| NIHSS ≤5 at 2hrs, N (%)                                                                                                                                                                                                                                                                                                                                  | 35 (34.6%)                         | 6 (24.0%)                | 1.68 (0.61,<br>4.59)   | 0.31                    |
| NIHSS ≤2 at 24hrs, N (%)                                                                                                                                                                                                                                                                                                                                 | 26 (25.7%)                         | 5 (20.0%)                | 1.39 (0.47,<br>4.07)   | 0.55                    |
| NIHSS ≤2 at 90 days, N (%)                                                                                                                                                                                                                                                                                                                               | 47 (46.5%)                         | 11 (44.0%)               | 1.11 (0.46,<br>2.67)   | 0.82                    |
| <b>Other potential early endpoints</b>                                                                                                                                                                                                                                                                                                                   |                                    |                          |                        |                         |
| Change in NIHSS from baseline to 24 hours                                                                                                                                                                                                                                                                                                                |                                    |                          |                        |                         |
| <b>Median (IQR)</b>                                                                                                                                                                                                                                                                                                                                      | <b>-5.0 (-9.0, -1.0)</b>           | <b>-5.0 (-8.0, -1.0)</b> |                        | <b>0.84<sup>^</sup></b> |
| <p>*exact logistic and CI<br/> worst outcome assumed if NIHSS not available (due to death or paralysis / sedation )<br/> <sup>^</sup> P-value from Wilcoxon rank sum; 2 hour NIHSS carried forward for 5 subjects (3 in the rt-PA alone group) with missing 24 hour NIHSS: Change = 24 hour NIHSS (or last measure carried forward) – baseline NIHSS</p> |                                    |                          |                        |                         |

## Asymptomatic ICH

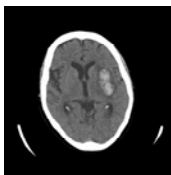

PH-2

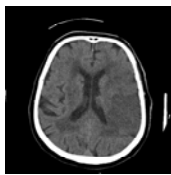

PH-1

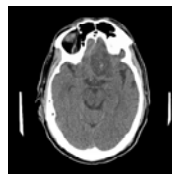

PH-1

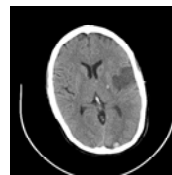

PH-1

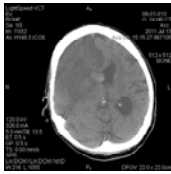

PH-1

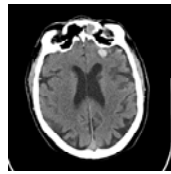

PH-1

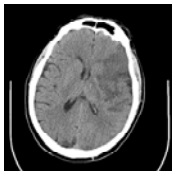

PH-1

## Appendix

The following investigators and institutions participated in the CLEAR-ER Trial:

**Co-Principal Investigators:** Arthur M. Pancioli MD and Opeolu Adeoye MD MS University of Cincinnati

**Steering Committee:** Joseph Broderick MD University of Cincinnati; Pamela A. Schmit RN BSN University of Cincinnati; Jane Khoury PhD Cincinnati Children's Hospital Medical Center; Heidi Sucharew PhD Cincinnati Children's Hospital Medical Center; Scott Janis PhD NIH/NINDS; Thomas Tomsick MD University of Cincinnati; Claudette E. Brooks MD West Virginia University; Todd Crocco MD; West Virginia University; Thomas Hemmen MD PhD University of California San Diego; Scott E. Kasner MD University of Pennsylvania; James S. McKinney MD UMDNJ-Robert Wood Johnson Medical School; William J. Meurer MD University of Michigan; Alex Schneider MD Mission Hospital; Sidney Starkman MD University of California at Los Angeles; Steven Warach MD PhD NIH/NINDS

**Medical Safety Monitor:** Steven Levine MD The State University of New York (SUNY)

**Data and safety monitoring board:** Claudia Moy PhD, NIH/NINDS; K. Michael Welch MB ChB Rosalind Franklin University; Gretchen Tietjen MD Medical University of Toledo; William R. Clarke PhD University of Iowa

**Site sub-investigators: University of Cincinnati:** Jordan Bonomo MD; Erin McDonough MD; Simona Ferioli MD; Felipe de los Rios De la Rosa MD; Sharyl Martini MD PhD; Daniel Woo MD; Rachel Garvin MD; Dawn Kleindorfer MD; Pooja Khatri MD; Anna Gensic MD; Matthew Flaherty MD; Daniel Kanter MD; Brett Kissela MD; Brian Stettler MD; Jason Mackey MD; Rhonda Cadena MD; Shannon Kohake MD; Laura Heitsch MD; Samir Belagaje MD; Achala Vagal MD **NIH/NINDS:** John Hallenbeck MD; Richard Benson MD PhD; Amie Hsia MD; Rakesh Jaitly MD; Lawrence Latour PhD; John Lynch MD; Jose Merino MD; Ravi Menon MD; Jason Freeman MD; Alejandro Magadan MD; Nandakumar Magaraja MD; Jennifer Jothan DO; Bonanle Famakin MD; Shlee Song MD; Alex Katcheves MD; Zurab Nadareishvili MD; Carsen Ritter MD **University of Michigan:** William Barsan MD; Devin Brown MD; Lewis Morgenstern MD; Robert Silbergleit MD; Venkatakrishna Rajajee MD; Lesli Rusche-Skolarus MD; Jim Burke MD; Jeffrey Fletcher MD; Eric Adelman MD; Michael Wang MD PhD; Darin Zahuranec MD **University of Pennsylvania:** Brett Cucchiara MD; Steven Messe MD; Christina Wilson MD; Koto Ishida MD; Michael Mullen MD; Jonathan Raser MD; Swaroop Pawar MD; David Rose MD; Neelofer Shafi MD; Igor Rybinnik MD; Michael McGavery MD; Lauren Beslow MD; Lauren Sansing MD **UCLA:** Latisha Ali MD; Hermelinda Abcede MD; Peter Adamczyk MD; William Buxton MD; Michael Froehler MD PhD; Doojin Kim MD; David Liebeskind MD; Bruce Ovbiagele, MD; Verna Porter MD; Venkatakrishna Rajajee MD; Neal Rao MD; Radoslav Raychev MD; Sarah Song MD; Jeffrey Saver MD; Matthew Tenser MD; Shamsha Velani MD; Anil Yallapragada MD **UCSD:** Brett Meyer MD; Any Guzik MD; Kiet Loc MD; Dawn Meyer PhD; Gilda Tafreshi MD; Jessica Choe MD; Ajeet Sodhi MD; Patrick Delaney MD; Sean Evans MD ; Omar A. Ghausi MD; Nhu Bruce MD; Will Neil MD; Brank Huisa MD; Andrew Stemer MD **Mission Hospital:** Reid Taylor MD; Jeanette Larson MD; Seth

Larson MD; Rodney Leacock MD; **UMNDJ:** Subasisni Dash MD; Robert Eisenstein MD; Raffi Kapitanyan MD; Ugo Paolucci MD; Chirag Shah MD; Win Toe MD **West Virginia University:** John Brick MD; Owen Lander MD; Hollynn Larrabee MD; Laurie Gutmann MD; Joseph Minardi MD; Allison Tadros MD; Roger Tillotson MD; Charles Whiteman MD; Debra Paulson MD; Rosanna Sikora MD; Christopher Cummings MD; John Foster Ditty MD

**Study coordinators: University of Cincinnati:** Janice Carrozzella RN BA; Traci Doellman RN BS; Irene Ewing RN BSN; Jamey Frasure RN PhD; Emily Goodall; Pamela Kimmel RN BSN; Judith Spilker RN BSN; Robert Tamer MS; Peggy Waymeyer RN; Joyce Zeigler **NIH/NINDS:** Lisa Davis RN MSN; Saman Farsad ;Teresa Morella RN; **University of Michigan:** Allison Kade BA; Shirley Frederiksen RN MS **University of Pennsylvania:** Mary Liz De Santo; Jean Luciano MSN **UCLA:** Judy Guzy RN BSN; Ileana Grunberg RN BSN; **UCSD:** Teresa Rzesiewicz RN BSN; Karen Rapp RN BSN **Mission Hospital:** Tracy Nanney RN BSN; Leslie Shell RN BSN; Margaret Perkins FNP; Cindy Benton MSN; Robin Jones MSN; Lynne Hampton RN; Claudine Cuento RN BSN; Rachel Alosky RN BSN; Stephanie Shepard RN BSN **UMDNJ:** Michelle Moccio MSN; Catherine Albrecht MSN; Yaritza Rosario APN-C; Deborah Caputo MSN **West Virginia University:** Stephen Davis MPA; Patricia Altemus MS; Martha Power FNP; Reyna VanGilder PhD; Jay Sherman RN; Taura Barr RN PhD
